# Supplementary material for: Human milk oligosaccharides promote immune tolerance via direct interactions with human dendritic cells
Source: PubMed Central journal article supplement (PMC6619030; doi:10.1002/eji.201847971), 2019-04-04
Supplement: EJI-49-1001-s001.pdf [file EJI-49-1001-s001.pdf]

# European Journal of Immunology

**Supporting Information**

**for**

**DOI 10.1002/eji.201847971**

Ling Xiao, Wouter RPH van De Worp, Roderick Stassen, Celine van Maastrigt,  
Nienke Kettelarij, Bernd Stahl, Bernadet Blijenberg, Saskia A. Overbeek,  
Gert Folkerts, Johan Garssen and Belinda van't Land

**Human milk oligosaccharides promote immune tolerance via direct interactions  
with human  
dendritic cells**

## Supporting Information

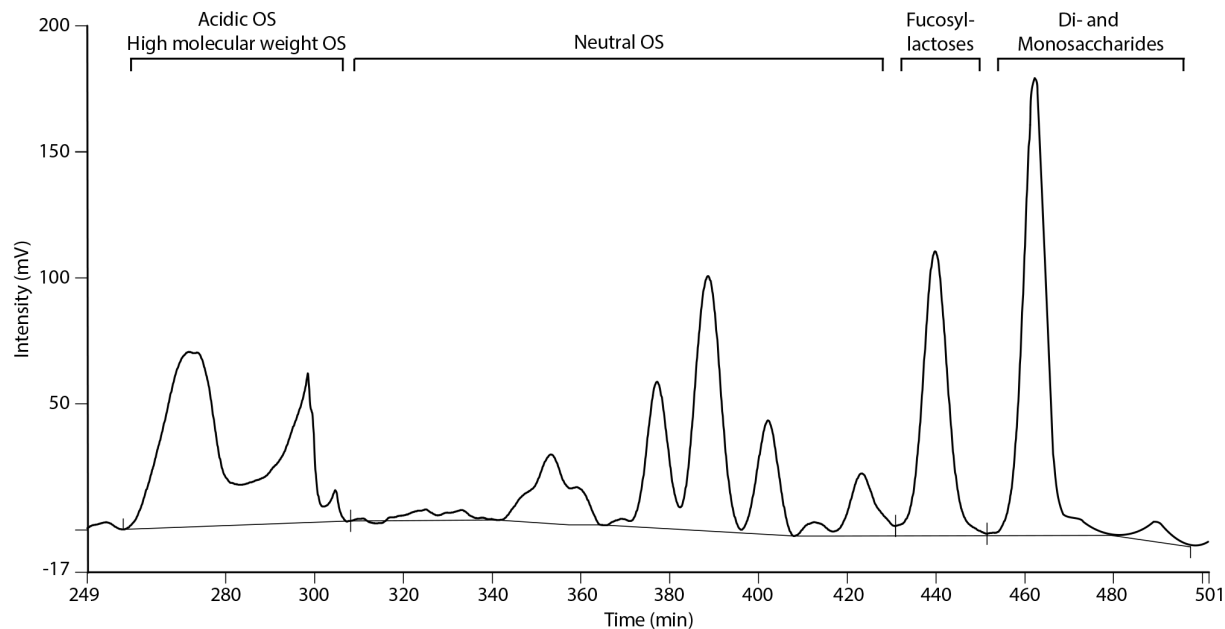

| Peak name                             | Area (mV*min) | Relative area (%) | Glycosidic structure |
|---------------------------------------|---------------|-------------------|----------------------|
| Acidic OS<br>High molecular weight OS | 1490.99       | 28.60             |                      |
| Neutral OS                            | 1790.45       | 34.35             |                      |
| Fucosyllactoses                       | 745.688       | 14.3              |                      |
| Di- and<br>Monosaccharides            | 1185.98       | 22.75             |                      |

**Supplementary Figure 1. Distribution pattern of HMOs mixture by GPC.** The HMOs mixture was injected in a 2 times 5 x 110 cm Kronlab ECO50 column, packed with Toyopearl HW 40 (S) (TOSOH BIOSCIENCE). The chromatogram was obtained by refractive index detection.

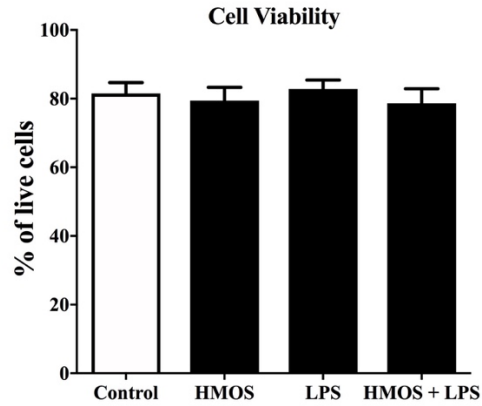

**Supplementary Figure 2. Cell viability of DCs treated by different conditions.** Neither LPS nor HMOS (5 mg/ml) did affect the cell viability compared to control. Mean± SEM is shown, N=6, Mann-Whitney test, no significant difference was observed between groups.

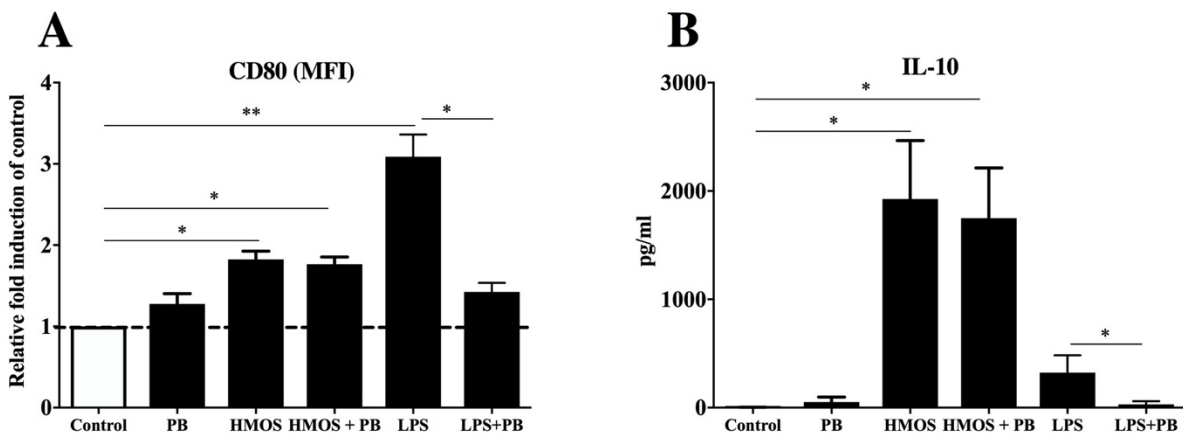

**Supplementary Figure 3. Removal of potential LPS contaminations by polymyxin B does not change the effects of HMOS.** HMOS (5 mg/ml) or LPS solution was incubated with 10µg/ml polymyxin B for 1h before treatment with DCs, after 24h, (A) CD80 expression and (B) IL-10 levels in the supernatant were analyzed by flow cytometry and Elisa assay, respectively. Mean± SEM is shown, N=3, Mann-Whitney test, \*p<0.05, \*\*p<0.01.

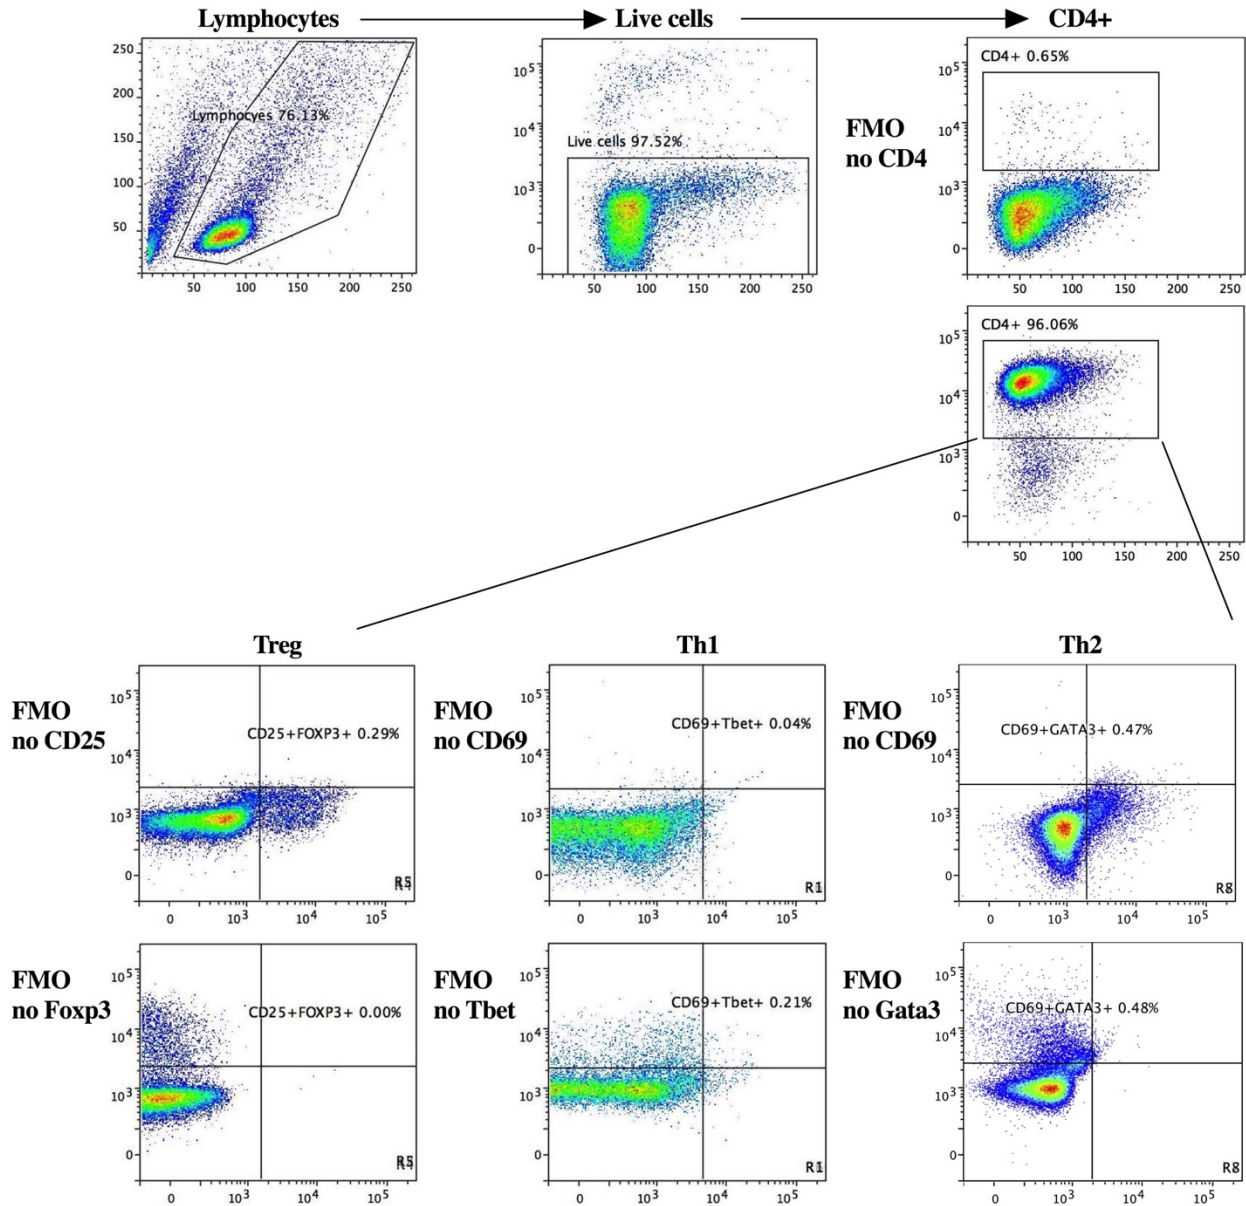

**Supplementary Figure 4. Gating strategy T-cell.** After 6 days of co-culture, cells were collected and analyzed by flow cytometry. Cells were first stained for viability using FVD (APC-Cy7), followed by extracellular staining of CD4 (PerCp-Cy5.5), CD25 (FITC) and CD69 (FITC). After fixation and permeabilization, cells were stained for intracellular markers FoxP3 (PE-Cy7), GATA3 (PE) and Tbet (PE-Cy7). Flow cytometry analysis software Flowlogic 7 (Inivai Technologies) was used to analyze the data. In our gating strategy, first, the singlets were selected. Next the lymphocytes were selected based on FSC and SSC. Out of the lymphocyte gate the alive cell population was selected. CD4+ cells were obtained out the gate of alive cells, using FMO control. CD25+ Foxp3+, CD69+ GATA3+ and CD69+ Tbet+ cells were derived out the gate of CD4+ cells, using FMO controls.
